# Supplementary material for: Real-World Outcome and Prognostic Factors in MDS Patients Treated with Azacitidine—A Retrospective Analysis
Source: MDPI journal article supplement (doi:10.3390/cancers16071333), 2024-03-29
Supplement: s1 [file s1]

**Supplementary Table S1**

Incidence rate of infectious complications.

| Number of infection episodes, n | Number of patients, n (%) |
|---------------------------------|---------------------------|
| <b>0</b>                        | 24 (30.4%)                |
| <b>1</b>                        | 22 (27.9%)                |
| <b>2-3</b>                      | 24 (30.4%)                |
| <b>4</b>                        | 6 (7.6%)                  |
| <b>≥ 5</b>                      | 3 (3.8%)                  |

**Supplementary Table S2**

Schedule modifications and dose adjustment in AZA treatment.

| Type of intervention                 | Number of patients, n (%) |
|--------------------------------------|---------------------------|
| <b>Dose reduction</b>                |                           |
| Yes                                  | 23 (29,1%)                |
| No                                   | 56 (70.9%)                |
| <b>Cycle reduction (&lt; 7 days)</b> |                           |
| Yes                                  | 25 (31,6%)                |
| No                                   | 54 (68.4%)                |
| <b>Treatment delay</b>               |                           |
| Yes                                  | 7 (8,9%)                  |
| No                                   | 72 (91.1%)                |

**Supplementary Table S3**

Univariate analysis of factors influencing response to treatment.

| Parameter<br>Median (range)       | Treatment response        |                       | p    |
|-----------------------------------|---------------------------|-----------------------|------|
|                                   | CR + PR + HI + SD<br>n=51 | PD<br>n=28            |      |
| <b>Bone marrow blasts</b>         | 8<br>(0.8-19)             | 10<br>(0.6-15.8)      | 0.69 |
| <b>WBC (G/l)</b>                  | 2.3<br>(0.6-11.5)         | 2.2<br>(0.1-17.8)     | 0.99 |
| <b>ANC (G/l)</b>                  | 0.9<br>(0.0-7.9)          | 0.9<br>(0.1-10.8)     | 0.68 |
| <b>HGB (g/dl)</b>                 | 7.9<br>(4.2-13.8)         | 7.8<br>(5.4-10.4)     | 0.27 |
| <b>PLT (G/l)</b>                  | 64<br>(10-343)            | 53.5<br>(7-300)       | 0.22 |
| <b>LDH (U/l)</b>                  | 393<br>(162-1064)         | 415<br>(220-1426)     | 0.99 |
| <b>Serum ferritin<br/>(ng/ml)</b> | 403<br>(41-6552)          | 656.7<br>(12.3-10410) | 0.39 |
| <b>Age (years)</b>                | 69<br>(42-89)             | 68.5<br>(59-85)       | 0.49 |
| <b>BMI</b>                        | 25.7<br>(18-36.1)         | 26.6<br>(19.3-36.1.)  | 0.49 |
| <b>HCT-CI</b>                     | 1<br>(0-6)                | 1<br>(0-7)            | 0.55 |

WBC: white blood cell; ANC: absolute neutrophil count; HGB: hemoglobin; PLT: platelets; LDH: lactate dehydrogenase; BMI: body mass index; HCT-CI: The Hematopoietic cell transplantation-specific comorbidity index; ECOG: Eastern Cooperative Oncology Group.

**Supplementary Table S4**

Univariate analysis of factors associated with treatment response.

| Parameter            | Treatment response        |       |            |      | p    |
|----------------------|---------------------------|-------|------------|------|------|
|                      | CR + PR + Hi + SD<br>n=51 |       | PD<br>n=28 |      |      |
|                      | n                         | %     | n          | %    |      |
| <b>Gender</b>        |                           |       |            |      |      |
| Male                 | 27                        | 60.0  | 18         | 40.0 | 0.33 |
| Female               | 24                        | 70.6  | 10         | 29.4 |      |
| <b>WHO diagnosis</b> |                           |       |            |      |      |
| MDS-MLD              | 5                         | 83.3  | 1          | 16.7 | 0.79 |
| MDS-RS               | 1                         | 100.0 | 0          | 0.0  |      |
| MDS EB-1             | 17                        | 65.4  | 9          | 34.6 |      |
| MDS-EB-2             | 24                        | 60.0  | 16         | 40.0 |      |
| MDS 5q-              | 1                         | 100.0 | 0          | 0.0  |      |

|                                  |    |        |    |       |             |
|----------------------------------|----|--------|----|-------|-------------|
| t-MDS                            | 3  | 60.0   | 2  | 40,0  |             |
| <b>IPSS risk group</b>           |    |        |    |       |             |
| Intermediate-1                   | 16 | 80.0   | 4  | 20.0  | 0.24        |
| Intermediate-2                   | 27 | 60.0   | 18 | 40.0  |             |
| High                             | 8  | 57.1   | 6  | 42.9  |             |
| <b>IPSS-R risk group</b>         |    |        |    |       |             |
| Intermediate-2                   | 13 | 81.3   | 3  | 18.8  | 0.12        |
| High                             | 20 | 69.0   | 9  | 31.0  |             |
| Very high                        | 18 | 52.9   | 16 | 47.1  |             |
| <b>Cytogenetic risk (IPSS)</b>   |    |        |    |       |             |
| Good                             | 27 | 73.0   | 10 | 27.0  | <b>0.03</b> |
| Intermediate                     | 8  | 88.9   | 1  | 11.1  |             |
| Poor                             | 13 | 48.1   | 14 | 51.9  |             |
| <b>Cytogenetic risk (IPSS-R)</b> |    |        |    |       |             |
| Very good                        | 1  | 100.0  | 0  | 0     | 0.39        |
| Good                             | 26 | 72.2   | 10 | 27.8  |             |
| Intermediate                     | 6  | 66.7   | 3  | 33.3  |             |
| Poor                             | 2  | 33.3   | 4  | 66.7  |             |
| Very poor                        | 13 | 61.9   | 8  | 38.1  |             |
| <b>Complex karyotype</b>         |    |        |    |       |             |
| Yes                              | 13 | 59.1   | 9  | 40.9  | 0.43        |
| No                               | 35 | 68.6   | 16 | 31.4  |             |
| <b>Monosomal karyotype</b>       |    |        |    |       |             |
| Yes                              | 9  | 52.9   | 8  | 47.0  | 0.2         |
| No                               | 39 | 69.6   | 17 | 30.4  |             |
| <b>Peripheral blood blasts</b>   |    |        |    |       |             |
| Present                          | 18 | 64.3   | 10 | 35.7  | 0.84        |
| Absent                           | 28 | 66.7   | 14 | 33.3  |             |
| <b>BMI</b>                       |    |        |    |       |             |
| 18,50 <                          | 1  | 100.00 | 0  | 0.0   | 0.63        |
| 18,50-24,99                      | 19 | 67.9   | 9  | 32.1. |             |
| 25-29,99                         | 23 | 63.9   | 13 | 36.1. |             |
| > 30                             | 8  | 61.5   | 5  | 38.5  |             |
| <b>Transfusion dependence</b>    |    |        |    |       |             |
| RBC-TD                           | 26 | 61.9   | 16 | 38.1  | 0.19        |
| RBC-TD + PLT-TD                  | 7  | 50.0   | 7  | 50.0  |             |
| Transfusion independent          | 18 | 78.3   | 5  | 21.7  |             |

CR: complete remission; PR: partial remission; HI: hematologic improvement; SD: stable disease; PD: progressive disease; WHO: World Health Organization; MDS: myelodysplastic syndrome; MDS-MLD: myelodysplastic syndrome with multilineage dysplasia; MDS-RS: myelodysplastic syndrome with ring sideroblasts; MDS-EB: myelodysplastic syndrome with excess of blasts; U: unclassifiable; t-MDS: therapy-related myelodysplastic syndrome; IPSS: International Prognostic Scoring System; IPSS-R: International Prognostic Scoring System revised; BMI: body mass index; RBC: red blood cell; TD: transfusion dependent; PLT: platelets.
