# Supplementary material for: Real-World Outcome and Prognostic Factors in MDS Patients Treated with Azacitidine—A Retrospective Analysis
Source: MDPI journal article supplement (doi:10.3390/cancers16071333), 2024-03-29
Supplement: s1 [file s1]

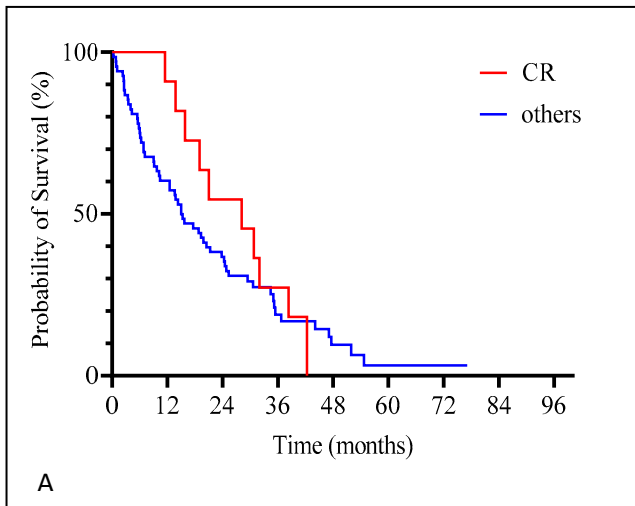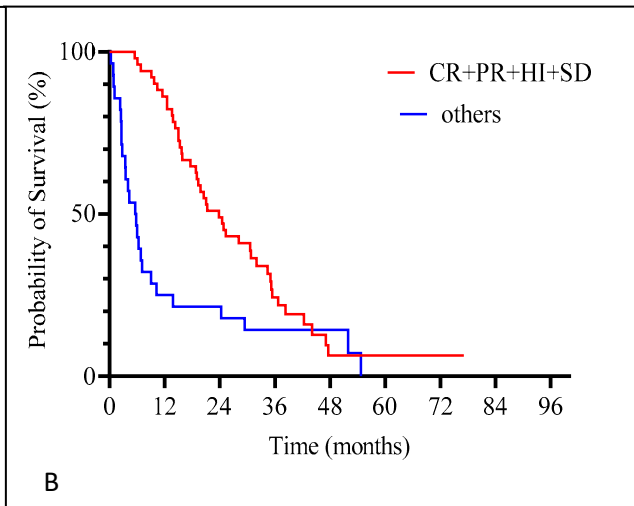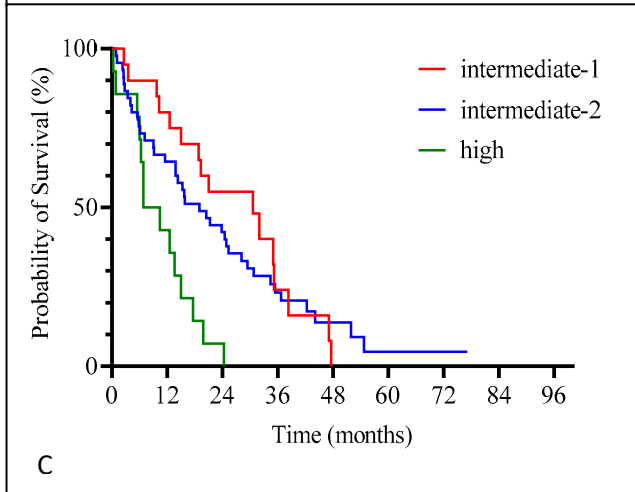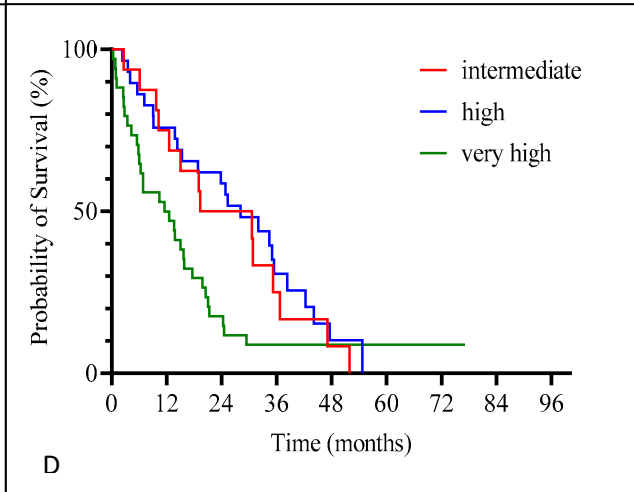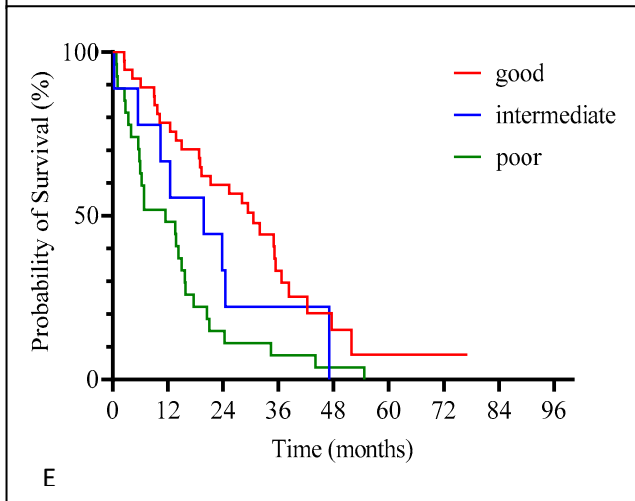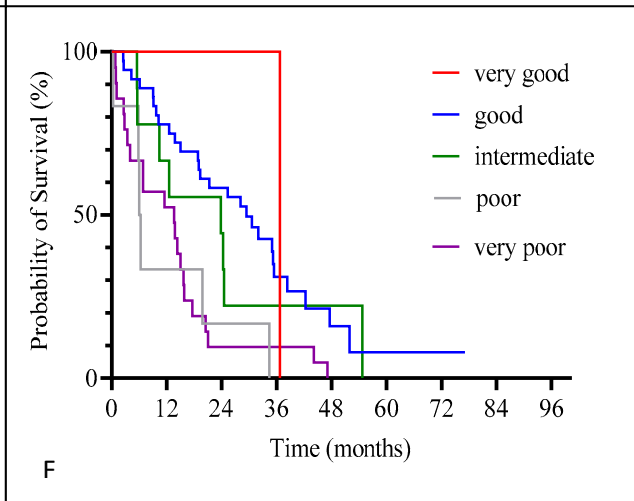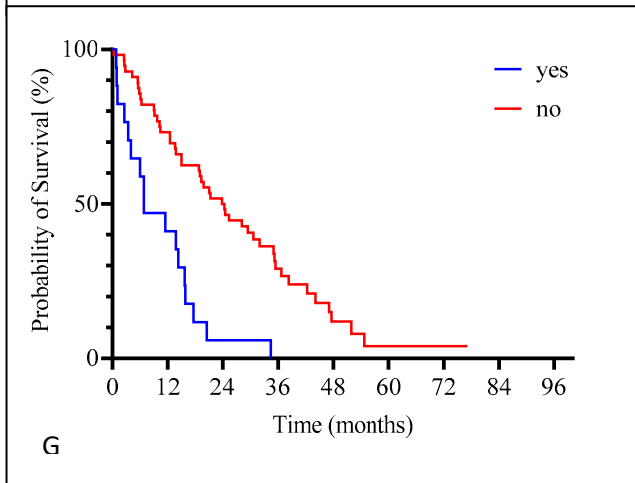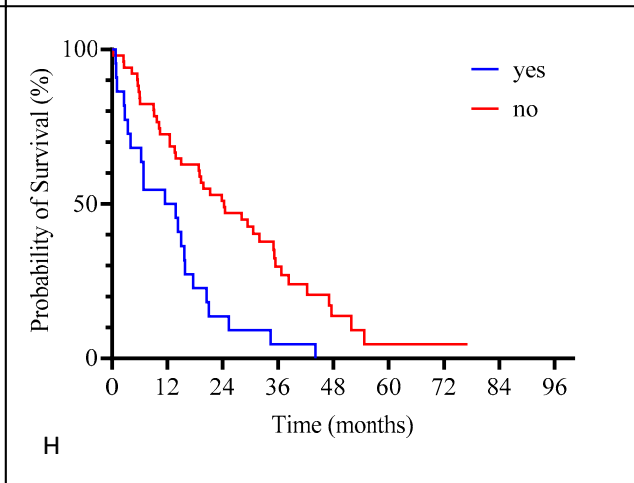

**Supplementary Figure S1** Prognostic factors of overall survival

A. Treatment response (CR vs others); B. Treatment response (CR+PR+HI+SD vs others); C. IPSS risk group; D. R-IPSS risk group; E. Cytogenetic risk (IPSS); F. Cytogenetic risk (IPSS-R); G. Complex karyotype; H. Monosomal karyotype.

CR: complete remission; PR: partial remission; HI: hematologic improvement; SD: stable disease; IPSS: International Prognostic Scoring System; IPSS-R: International Prognostic Scoring System revised
